# Supplementary material for: Enhancing the Seebeck effect in Ge/Si through the combination of interfacial design features
Source: PubMed Central journal article supplement (PMC6841935; doi:10.1038/s41598-019-52654-z), 2019-11-08
Supplement: 41598_2019_52654_MOESM2_ESM.pdf [file 41598_2019_52654_MOESM2_ESM.pdf]

## Enhancing the Seebeck effect in Ge/Si through the combination of interfacial design features

Andriy Nadtochiy<sup>1</sup>, Vasyl Kuryliuk<sup>1</sup>, Viktor Strelchuk<sup>2</sup>, Oleg Korotchenkov<sup>1,\*</sup>,  
Pei-Wen Li<sup>3</sup>, Sheng-Wei Lee<sup>4</sup>

<sup>1</sup>Taras Shevchenko Kyiv National University, Department of Physics, Kyiv 01601, Ukraine

<sup>2</sup>V.E. Lashkaryov Institute of Semiconductor Physics, National Academy of Sciences of Ukraine, Kyiv 03028, Ukraine

<sup>3</sup>National Chiao-Tung University, Department of Electronic Engineering, Hsin-Chu 30010, Taiwan, Republic of China

<sup>4</sup>National Central University, Institute of Materials Science and Engineering, Jhongli 32001, Taiwan, Republic of China

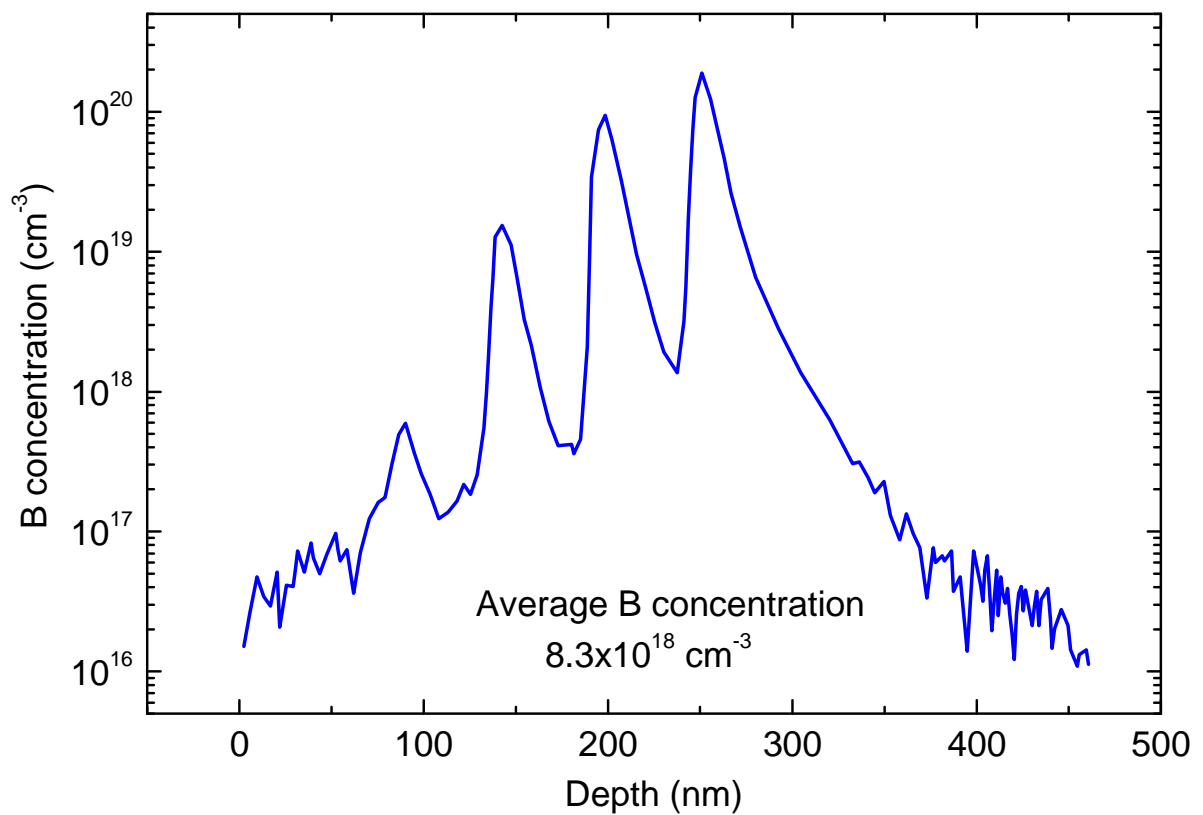

**Supplementary Fig. S1.** Depth profile of B concentration in four layers of B-doped epitaxial  $\text{Ge}_x\text{Si}_{1-x}$  film measured by SIMS. The atomic layer doping peaks are formed at different  $\text{B}_2\text{H}_6$  partial pressures.

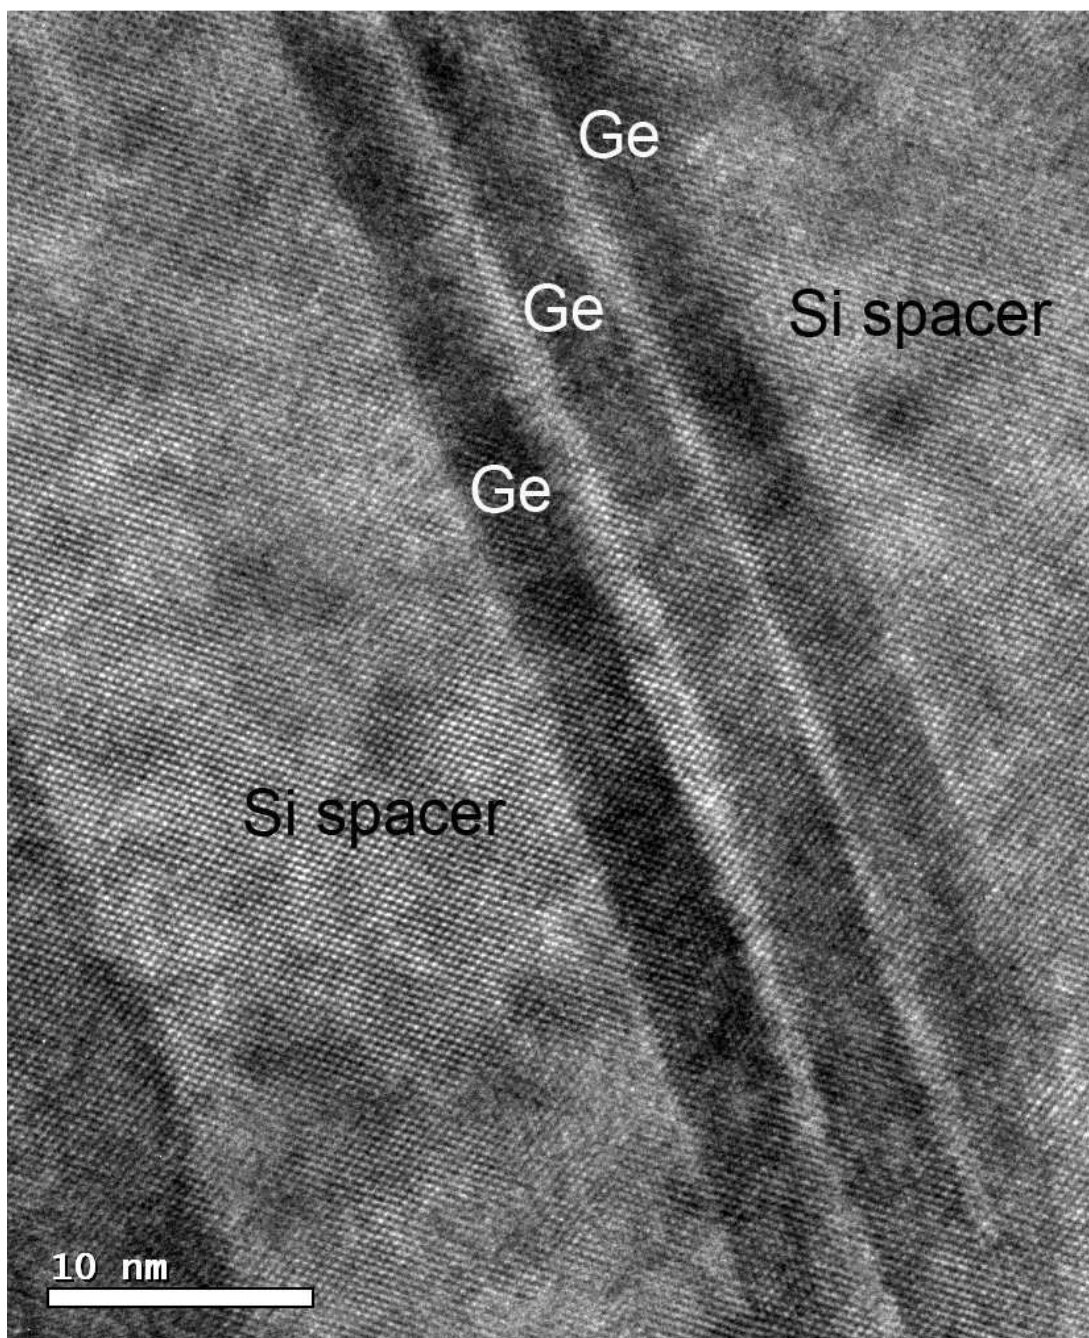

**Supplementary Fig. S2.** High-resolution XTEM micrograph showing a layer sequence inside a 3-fold-CQD (dark regions – Ge, light grey regions – Si).

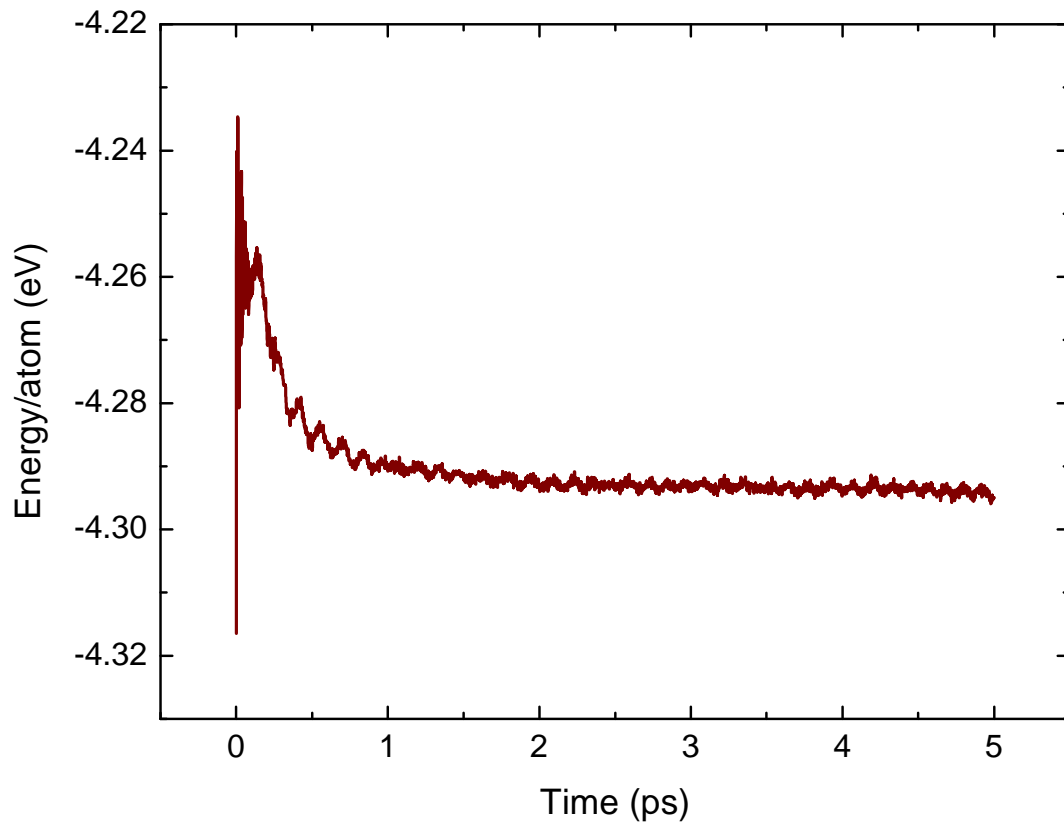

**Supplementary Fig. S3.** Calculated time evolution of the energy per atom of the Si matrix – Ge dot system (see Supplementary Video Legend).

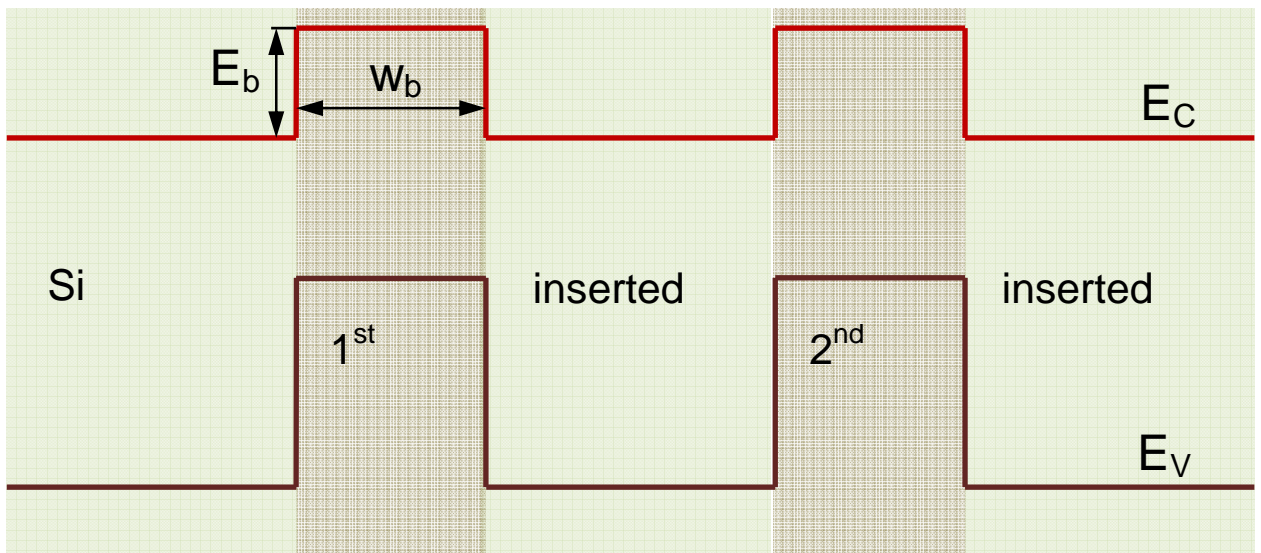

**Supplementary Fig. S4.** Schematic of two Ge layers in the CQD separated by Si layers inserted into the CQD, which are limited by rectangular potential barriers with the height  $E_b = 0.37$  eV determined by the potential step at the Si/Ge interface [1]. The conduction ( $E_C$ ) and valence band ( $E_V$ ) edges are represented by thick solid lines.  $w_b$  indicates the dot barrier width (Fig. 7 in the main text).

## Supplementary Video Legend

Supplementary Video clip illustrates the time evolution of the Ge (blue circles) and Si (red circles) atomic positions during 5 ps with the step of 2 fs after the Ge triangular dot is placed into the Si matrix at time moment  $t = 0$ . The temperature is 600°C. The Stillinger-Weber potential [2] is employed. The time evolution of the energy per atom of the Si matrix – Ge dot system, exemplified in Supplementary Fig. S3, demonstrates that the system has been settled down to a stable low energy state during 5 ps. This indicates that the Ge fraction in  $\text{Ge}_x\text{Si}_{1-x}$  saturates at a value of  $x = 67\%$  discussed in the main text. Simulation details can be found in Ref. [3].

## Supplementary References

1. Van de Walle, C. G. Band lineups and deformation potentials in the model-solid theory. *Phys. Rev. B* **39**, 1871–1883 (1989).
2. Stillinger, F.H. & Weber, T.A. Computer simulation of local order in condensed phases of silicon, *Phys. Rev. B* **31** 5262–5271 (1985).
3. Kuryliuk, V.V. & Korotchenkov, O.A. Atomistic simulation of the thermal conductivity in amorphous  $\text{SiO}_2$  matrix/Ge nanocrystal composites. *Physica E* **88**, 228–236 (2017).
